# Supplementary material for: Serine ADP-ribosylation marks nucleosomes for ALC1-dependent chromatin remodeling
Source: eLife journal article supplement (doi:10.7554/elife.71502), 2021-12-07

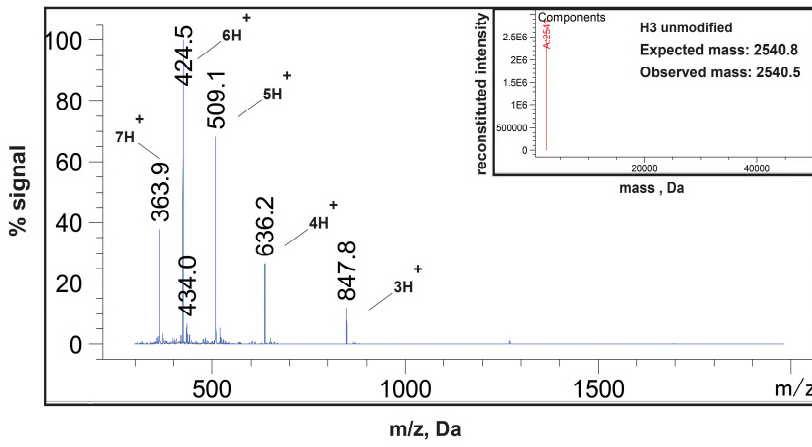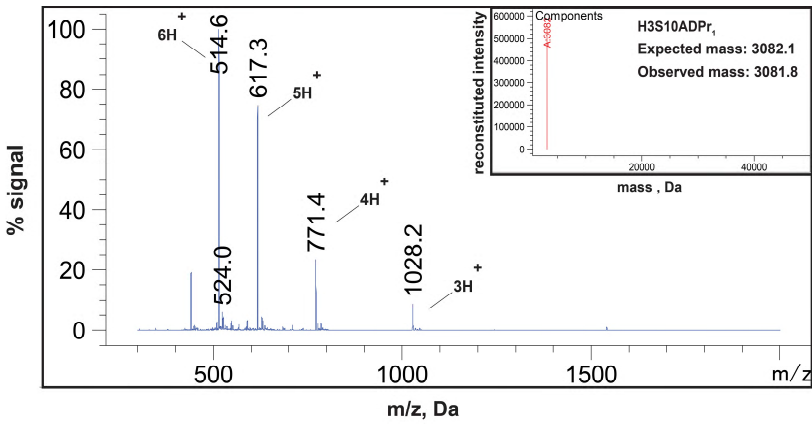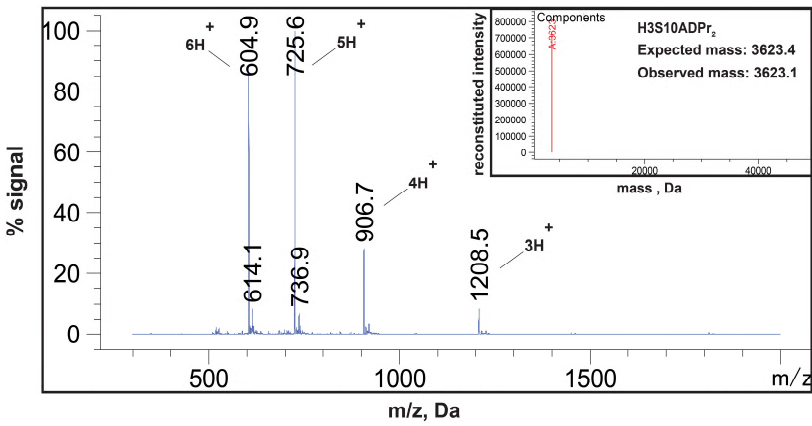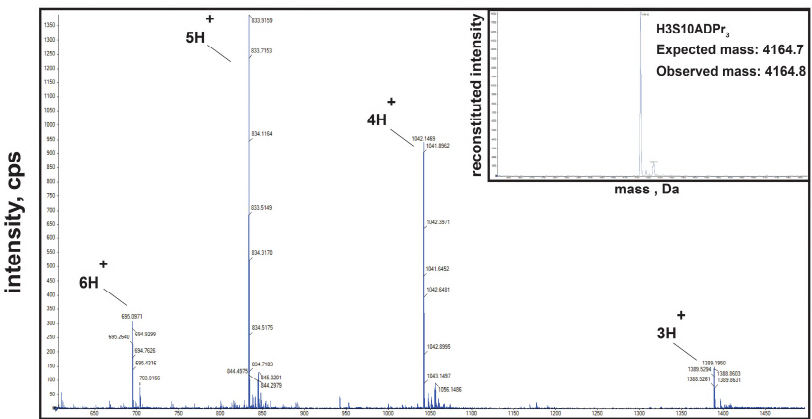

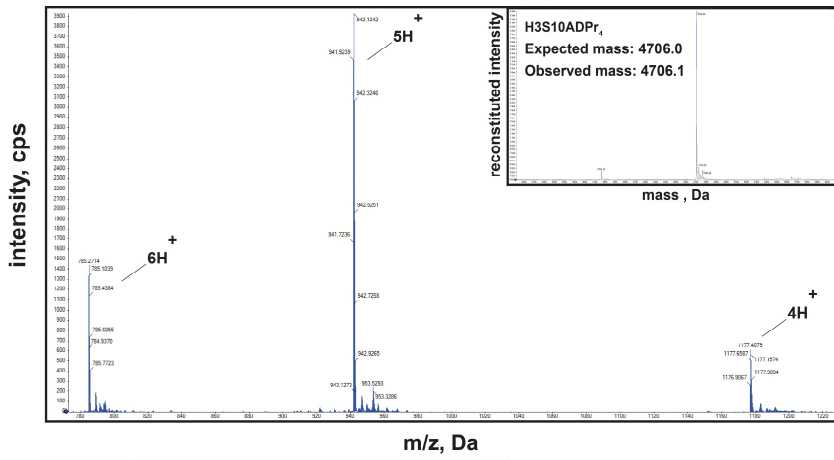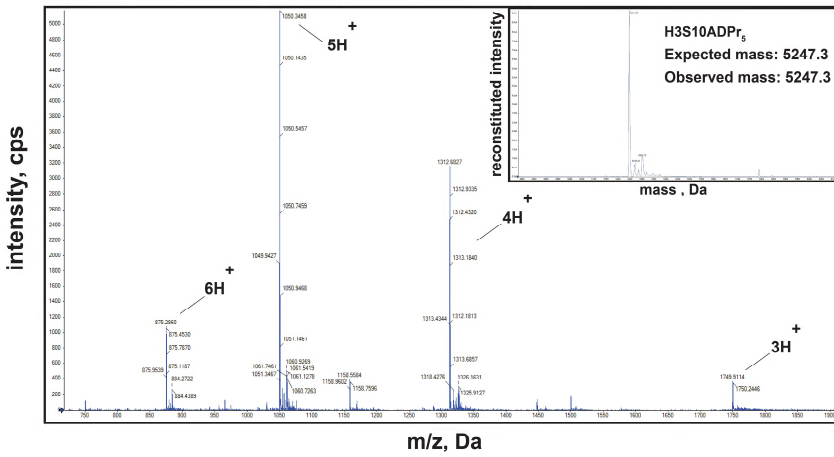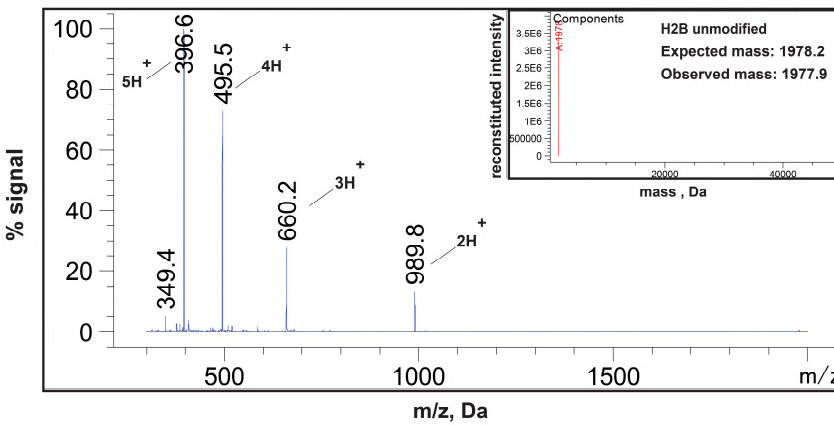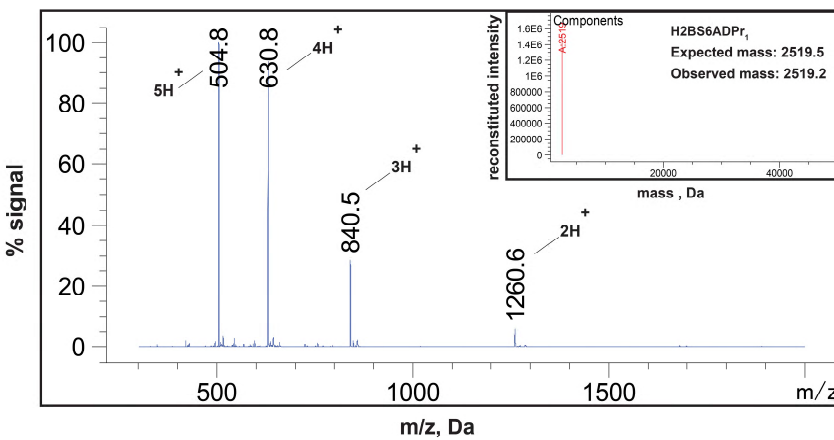

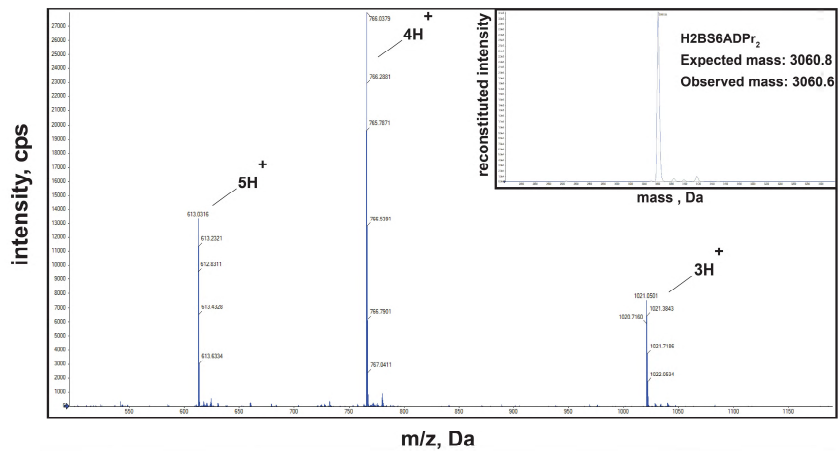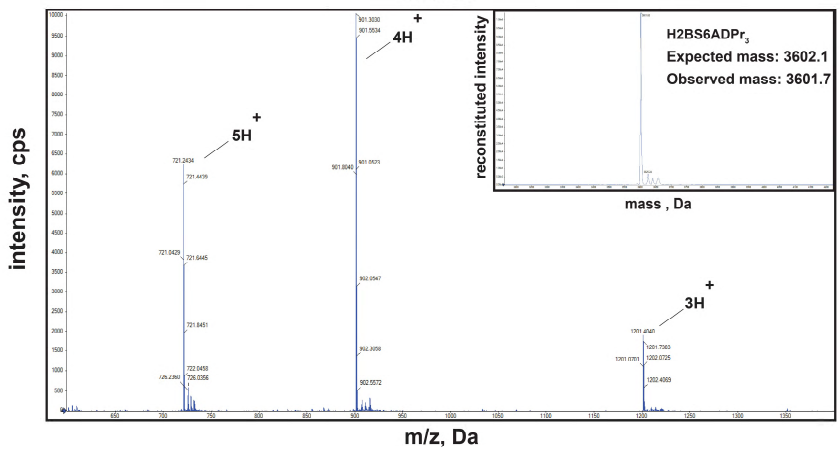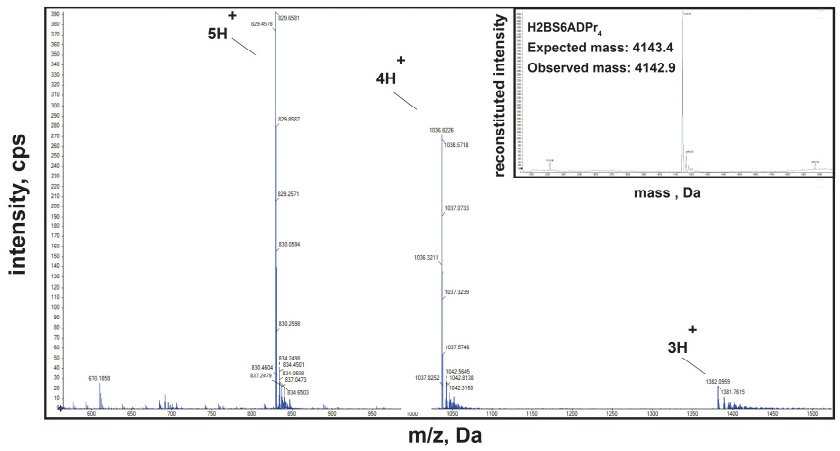

Supplement: supp3 [file elife-71502-supp3-v2.pdf]
