# Supplementary material for: Serine ADP-ribosylation marks nucleosomes for ALC1-dependent chromatin remodeling
Source: eLife journal article supplement (doi:10.7554/elife.71502), 2021-12-07

**A**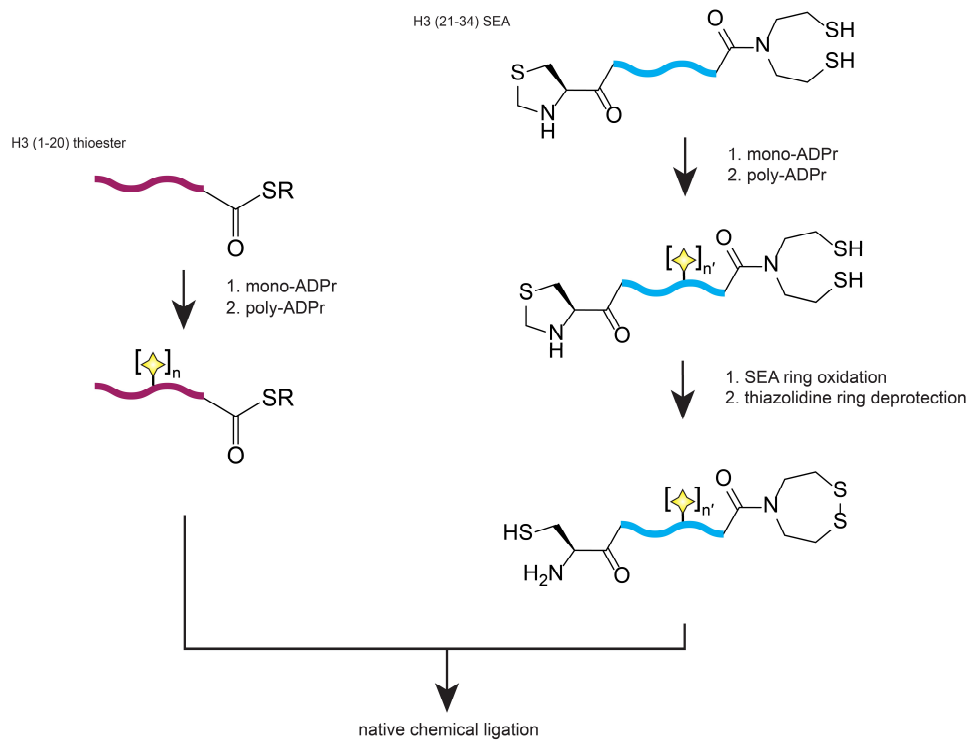**B**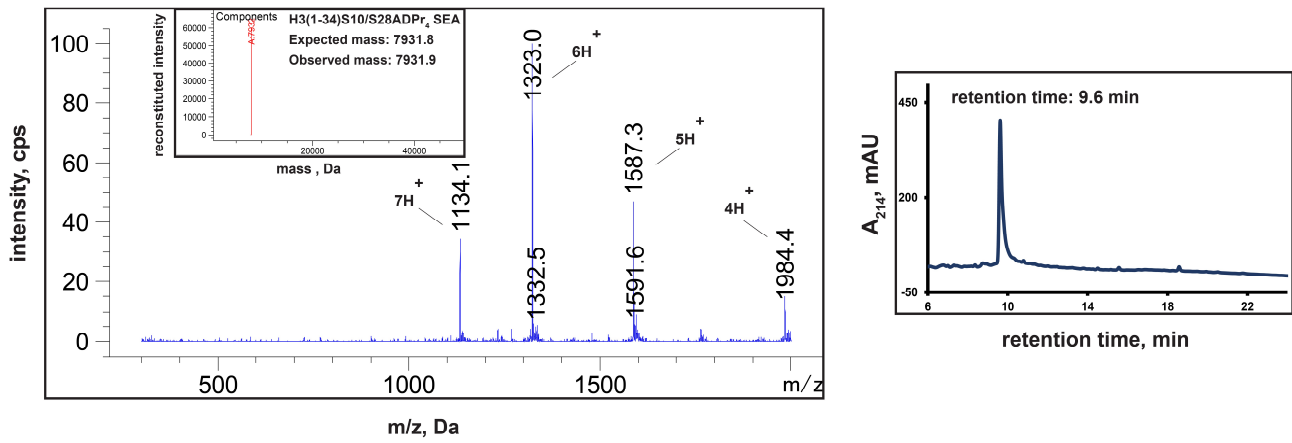

Supplement: supp9 [file elife-71502-supp9-v2.pdf]
